1 **Halfway to self-sustainability: Reintroduced migratory European**  
2 **Northern Bald Ibises (*Geronticus eremita*) still need management**  
3 **interventions for population viability**

4 SINAH DRENSKE, VIKTORIIA RADCHUK, CÉDRIC SCHERER, CORINNA ESTERER, INGO

5 KOWARIK, JOHANNES FRITZ\*<sup>†</sup>, STEPHANIE KRAMER-SCHADT\*

6 SINAH DRENSKE Technische Universität Berlin, Department of Ecology, Chair of Applied Animal Ecology,

7 Rothenburgstraße 12, 12165 Berlin, Germany. [sinah.drenske@campus.tu-berlin.de](mailto:sinah.drenske@campus.tu-berlin.de). [orcid.org/0000-0002-2247-](https://orcid.org/0000-0002-2247-)

8 6507; Also at: Department of Ecological Dynamics, Leibniz Institute for Zoo and Wildlife Research, Alfred-

9 Kowalke-Straße 17, 10315 Berlin, Germany.

10 VIKTORIIA RADCHUK Department of Ecological Dynamics, Leibniz Institute for Zoo and Wildlife Research,

11 Berlin, Germany. [orcid.org/0000-0003-3072-0095](https://orcid.org/0000-0003-3072-0095)

12 CÉDRIC SCHERER Department of Ecological Dynamics, Leibniz Institute for Zoo and Wildlife Research, Berlin,

13 Germany. [orcid.org/0000-0003-0465-2543](https://orcid.org/0000-0003-0465-2543)

14 CORINNA ESTERER Waldrappteam Conservation & Research, Schulgasse 28, 6162 Mutters, Austria.

15 INGO KOWARIK Technische Universität Berlin, Department of Ecology, Chair of Ecosystem Science and Plant

16 Ecology, Berlin, Germany. [orcid.org/0000-0002-8251-7163](https://orcid.org/0000-0002-8251-7163)

17 JOHANNES FRITZ (Corresponding author) Waldrappteam Conservation & Research, Schulgasse 28, 6162

18 Mutters, Austria. [orcid.org/0000-0003-4691-2892](https://orcid.org/0000-0003-4691-2892)

19 Also at: Department of Cognitive Biology, University of Vienna, Althanstrasse 14, 1090 Vienna, Austria

20 STEPHANIE KRAMER-SCHADT Department of Ecological Dynamics, Leibniz Institute for Zoo and Wildlife

21 Research, Berlin, Germany. [orcid.org/0000-0002-9269-4446](https://orcid.org/0000-0002-9269-4446)

22 Also at: Technische Universität Berlin, Department of Ecology, Chair of Applied Animal Ecology, Berlin,

23 Germany.

24 \*authors contributed equally; † corresponding author

## 25 **Abstract**

26 Northern Bald Ibis (NBI) have disappeared from Europe already in Middle Age. Since 2003 a  
27 migratory population is reintroduced in Central Europe. We conducted demographic analyses  
28 of survival and reproduction of 384 NBI over a period of 12 years (2008-2019). These data  
29 also formed the basis for a population viability analysis (PVA) simulating the possible future  
30 development of the NBI population in different scenarios. We tested life-stage specific  
31 survival rates for differences between these stages, raising types and colonies as well as the  
32 influence of stochastic events and NBI supplements on the population growth.

33 Stage specific survival rates ranged from 0.64 to 0.78. 61% of the mature females reproduce  
34 with a mean fecundity of 2.15 fledglings per nest. The complementary PVA indicated that the  
35 release population is close to self-sustainability with a given lambda 0.95 and 24% extinction  
36 probability within 50 years. Of the 326 future scenarios tested, 94 % reached the criteria of  
37 <5% extinction probability and population growth rates >1. In case of positive population  
38 growth, stochastic events had a limited effect. Of 820 sub-scenarios with different stochastic  
39 event frequencies and severities 87 % show population growth despite the occurrence of  
40 stochastic events.

41 Predictions can be made based on the results of the individual-based model as to whether and  
42 under what circumstances the reintroduced NBI population can survive. This study shows  
43 that a PVA can support reintroduction success that should work closely together with the  
44 project in the field for mutual benefit, to optimize future management decisions.

45

## 46 **Introduction**

47 In conservation biology, species restoration plays an increasingly important role to counteract  
48 the currently ongoing dramatic decline of biodiversity, to assist the colonization of once  
49 widespread species and to restore whole populations that have become extinct (IUCN/SSC,  
50 2013a; Destro et al., 2018; Pettorelli et al., 2018). Reintroductions are a key restoration  
51 method, defined by the IUCN as “the intentional movement and release of an organism inside  
52 its indigenous range from which it has disappeared”. Reintroductions commonly aim at  
53 minimizing interventions and allow for viable populations with lowest possible human  
54 support (Corlett, 2016).

55 Reintroduction efforts have been performed for an increasing range of species (Frey, 1992;  
56 Bennett et al., 2013; Fritz, Kramer, et al., 2017; Gray et al., 2017; Soorae, 2018), showing  
57 different levels of success. Impairments are mainly due to species interactions like predation,  
58 human-wildlife interactions and missing habitat suitability that all affect species’ viability  
59 and reproduction (Wimberger et al., 2009; Bennett et al., 2013; Robert et al., 2015). There is  
60 no general definition of reintroduction success (Robert et al., 2015), but it is recommended to  
61 calculate the population growth rate, population size and reproduction probabilities and the  
62 frequency of stochastic events, i. e. events that occur with a given probability and reduce the  
63 population size in the reintroduction site (Robert et al., 2015). Besides, it is of paramount  
64 importance to not only assess the long-term success of reintroductions under given  
65 constraints, but also to evaluate and rank the impact of management interventions taken in a  
66 retrospective way to be able to adjust management actions (Pereira & Navarro, 2015; Robert  
67 et al., 2015).

68 In this paper, we retrospectively analyse long-term demographic data (2008-2019) of a  
69 European migratory release population of the Northern Bald Ibis (*Geronticus eremita*,

70 hereafter NBI) and assess the long-term success of the reintroduction alongside the impact of  
71 management measures in an individual-based model (IBM). In 2002, a European group of  
72 scientists, called *Waldrappteam* and headed by J. Fritz, started an NBI research project which  
73 in 2014 changed into an EU LIFE+ funded reintroduction project. Their mainly used  
74 translocation action is the Human-Led Migration. Chicks from zoo breeding colonies are  
75 raised by human foster parents at breeding sites north of the Alps and trained to follow a  
76 microlight airplane, which leads them to the wintering site (Fritz, Kramer, et al., 2017; see  
77 also SUPPLEMENTARY MATERIAL 1).

78 We hypothesize that at the given stage the NBI population can survive without further  
79 management and release. We predict that observed demographic rates will ensure population  
80 growth and do not differ between the colonies.

## 81 **Material & Methods**

### 82 **Species and study area**

83 The NBI is a threatened species, listed in the IUCN Red List as *critically endangered* from  
84 1994 and down listed to *endangered* in 2018. The species is migratory, mainly insectivorous  
85 and reaches an age of up to 30 years in captivity. NBI are mainly seasonally monogamous  
86 and breed in colonies of up to hundreds of birds (Boehm et al., 2020). Juveniles learn the  
87 migration route by following conspecifics to the wintering ground, there they usually remain  
88 until they reach sexual maturity (Fritz, Unsoeld, et al., 2019). The last remaining wild  
89 population in the world changed to a sedentary lifestyle and lives year round at two breeding  
90 sites on the Atlantic coast of Morocco (Bowden et al., 2008).

91 The European release population consists of four breeding colonies in southern Germany  
92 (Burghausen, Überlingen) and Austria (Kuchl, Rosegg). The common wintering area is

93 located in Italy, in the Tuscan nature reserve WWF Oasi Laguna di Orbetello (FIG. 1) (Fritz,  
94 Unsoeld, et al., 2019).

95 

|          |
|----------|
| Figure 1 |
|----------|

## 96 **Data collection & study design**

97 384 NBIs which hatched between 2008 and 2019 are included in the study. Due to insensitive  
98 monitoring comprehensive data on genetically determined sex, raising type (either human-  
99 raised founder individuals FP, generation F0, or biological parent raised wild individuals BP,  
100 generations F1+), breeding colony and potentially date and cause of death or disappearance  
101 are available. Reproduction data include egg laying dates, clutch size, and pre-fledging  
102 survival probability. In the first years, spatio-temporal data are based exclusively on sight  
103 reports. From 2012 on, an increasing proportion of the birds carried GPS tags and from 2014  
104 onwards, the whole population could be remotely monitored (Sperger et al., 2017).

105 Founder individuals are raised by human foster parents (FP). In autumn of their first year,  
106 they followed a microlight air-plane to the wintering ground where they were released (Fritz,  
107 Kramer, et al., 2017). Since 2011, chicks are raised in the wild by their biological bird parents  
108 (BP). They follow their conspecifics to the common wintering ground along the migration  
109 corridor, which was established during release of the founder individuals. At time of the  
110 study, some of the released founder individuals were not yet assigned to a breeding colony, as  
111 they have not yet migrated back to a breeding area.

112 The NBIs of all four breeding colonies are considered as one population, sharing the same  
113 wintering ground and separating for breeding, with genetic exchange (Fritz, Kramer, et al.,  
114 2017; Fritz, Wirtz, et al., 2017; Wirtz et al., 2018).

## 115 **Definition of demographic stages and demographic analyses**

116 For the determination of demographic stages, the 384 NBI were assigned to four stages  
117 representing age classes with characteristic life-history events (FIG. 2; see also  
118 SUPPLEMENTARY FIG. 2). Stage 1 are juveniles from fledging until end of their first year of  
119 life; after the first autumn migration these birds usually remain at the wintering grounds.  
120 Stage 2 are juveniles in their second year of life; they usually stay year-round at the wintering  
121 grounds. Stage 3 are subadult birds in their third year of life; although not mature, most of  
122 them perform a partial or even full migration. Stage 4 are adults older than 3 years; these  
123 birds usually migrate and reproduce annually, even though some individuals may remain at  
124 the wintering ground.

125 

|          |
|----------|
| Figure 2 |
|----------|

126 For the calculation of survival probabilities per stage, sex, colony and raising type we used  
127 the Kaplan-Meier estimator (Kaplan & Meier, 1958) with the 'survival'-package v. 3.2-7 in R  
128 v. 4.0.3 (Therneau, 2015; R Core Team, 2020). We estimated survival probabilities for  
129 fledglings around 45 days of age. Adult birds that were only temporarily added during the  
130 breeding season to improve breeding success were discarded from the calculations of the  
131 survival probabilities. We used a likelihood ratio test (LRT) to test for significance between  
132 different classes in Cox proportional hazard models (Kleinbaum & Klein, 2012). We also  
133 calculated hatching rate and fledging rate.

134 Fecundity was calculated as the mean number of fledglings per nest. At the start-up of new  
135 founded colonies, adult males and females were temporarily added at the breeding site to  
136 compensate for missing mates and to enable the birds to reproduce. The rate of temporarily  
137 added adults was successively reduced and completely terminated at the end of the data  
138 period.

## 139 **Population Viability Analysis**

140 For the Population Viability Analysis (PVA) we focus our analyses and population  
141 projections on the female half of the population (underlying a sex-ratio of 1:1). We tested  
142 how different values of demographic rates used for the four stages, as analysed from field  
143 data, influence population trajectories and population viability.

144 We analysed the population trajectories per scenario (see below) and calculated the extinction  
145 probability as the number of runs of 100 repetitions per scenario where the population went  
146 extinct (0 individuals) within the simulated 50 years ( $P_{EXT\_50}$ ), and the intrinsic growth rate of  
147 the population ( $\lambda$ ), calculated as the mean of the annual finite rate of change in  
148 population size. Then, we analysed the distribution of the input parameters of demographic  
149 rates in scenarios where  $\lambda > 1$  and  $P_{EXT\_50} \leq 5\%$ . In addition, we ran generalized linear  
150 models (GLMs) and conducted an analysis of variance (anova) to rank the contribution of  
151 demographic rates in the different stages on  $\lambda$  as response variable, using a gamma  
152 error structure with inverse link. Besides, we calculated how often each combination of  
153 stochastic event frequency (5-20%) and severity (5-25%) and each combination of numbers  
154 of supplements (15 or 30) and time span of intervention (4 or 7 years) occurred in sub-  
155 scenarios resulting in  $\lambda > 1$  and  $P_{EXT\_50} \leq 5\%$ .

156 The model documentation follows the TRACE documentation framework (Grimm et al.,  
157 2014; SUPPLEMENTARY MATERIAL 3). The model description follows the ODD protocol  
158 (Grimm et al., 2006, 2010). An individual-based model (IBM) was implemented in NetLogo  
159 6.0.3 (Wilensky, 1999). The corresponding NetLogo and R scripts are provided online  
160 (SUPPLEMENTARY MATERIAL 6).

## 161 **Reproductive Rates**

162 For the PVA we only considered female fledglings. From fledglings with unknown sex 50%  
163 were included. For the analysis we included all adult females in the release population (stage  
164 4), irrespective whether they were breeding or not, plus adult females which were temporarily  
165 added at the breeding site to compensate for missing mates. Thus, different to  $RR_{Nest}$  this  
166 reproductive rate is an expression of breeding probability, it indicates how likely it is that a  
167 female will breed.

168 Three different reproductive rate (RR) were included into the PVA, depending on the  
169 fledglings that were included:  $RR_{Baseline}$  includes fledglings raised by adult wild females  
170 (stage 4);  $RR_{Status\ quo}$  includes in addition female fledglings raised by temporarily added  
171 females;  $RR_{All\ chicks}$  includes in addition female fledglings raised by human foster-parents.

172  $RR_{Baseline}$  was also calculated separately for the two colonies Burghausen and Kuchl ( $RR_B$  and  
173  $RR_K$ ) and separately for females raised by bird parents ( $RR_{BP}$ ) and human foster-parents  
174 ( $RR_{FP}$ ). We also implemented GLMMs (generalized linear mixed models) using a Poisson  
175 error structure and maximum likelihood fit, to investigate if differences in reproduction are  
176 significant.

## 177 **Scenario development**

178 We analysed the model for two different types of scenarios:

179 (I) The management scenarios (MScen) compare situations where no management took place  
180 (baseline scenario  $S_{Base}$ ), i.e. release of fledglings or temporary release of adults, to scenarios  
181 where baseline demographic rates were improved by 10%, 25% and 100%. We combined  
182 three levels of survival rates at each stage and four levels of RR in a full factorial design.  
183 Additionally, we combined  $RR_{Status\ quo}$  and  $RR_{All\ chicks}$  with baseline survival probabilities,  
184 which resulted in 326 MScen (TABLE 1, SUPPLEMENTARY MATERIAL 4). Only for the



185 simulation of  $S_{\text{Base}}$  we draw the demographic rates from the probability distributions defined  
186 by mean and standard deviation to test Hypothesis 1 (H1). For all other scenarios we used the  
187 calculated mean values of demographic rates. Besides, we chose 14 scenarios of special  
188 interest for closer examination (TABLE 1). All parameter combinations were within the scope  
189 of realistic management measures to improve survival and reproduction.

190 (II) The stochastic event and juvenile supplement scenarios (SJS) assess reproduction  
191 improvement by the supplemental release of FP juveniles (F0). For these SJS we crossed  
192  $S_{\text{Base}}$  and the MScen of special interest where  $\lambda > 1$  and  $P_{\text{EXT}_{50}} \leq 5\%$  (9 MScen, see  
193 results) with 4 levels of stochastic event frequency (5, 10, 15, 20), 5 levels of severity (5, 10,  
194 15, 20, 25; additional mortality per stage), 2 levels of the number of supplements (15, 30) and  
195 2 levels of the time for supplementing individuals (4 or 7 years).

196 

|         |
|---------|
| Table 1 |
|---------|

## 197 **Results**

### 198 **Demography**

199 From the 384 individuals, 195 were males and 184 females, what gives a sex rate of 1.00:0.94  
200 (m:f). For 5 juveniles, sex was not determined at time of data analysis. Concerning the raising  
201 type, N=162 birds were raised in the wild by bird-parents (42%; BP), N=213 individuals by  
202 foster-parents (55%; FP) and N=9 supplemented as juveniles (2%). Concerning the breeding  
203 colonies, N=127 individuals belonged to Burghausen (33%), N=89 to Kuchl (23%), N=89 to  
204 Überlingen (23%), N=22 to Rosegg (6%) and N=57 juveniles were not yet assigned at time of  
205 the data collection. 232 birds died during the data collection period; out of that N=123 during  
206 stage 1 (53%), N=45 during stage 2 (19%), N=33 during stage 3 (14%) and N=31 during  
207 stage 4 (13%; see also SUPPLEMENTARY FIG. 1).

208 At the end of 2019, 152 individuals were alive including 9 individuals which were delivered  
209 to zoos for various reasons. Thus, the release colony at end of the data collection consisted of  
210 143 individuals, 69 males and 74 females (sex rate of 1.00:1.07). Concerning the life stage,  
211 N=71 individuals belonged to stage 1 (50%; 37f, 34m), N=28 to stage 2 (20%; 11f, 17m),  
212 N=13 to stage 3 (9%; 8f, 5m) and N=31 to stage 4 (22%; 18f, 13m). Concerning the colonies,  
213 N=33 bird belonged to the colony Burghausen (23%), N=33 to Kuchl (23%), N=51 to  
214 Überlingen (36%) and N=15 to Rosegg (10%); 11 individuals (8%) were not yet allocated to  
215 a colony. Concerning the raising types, N=68 birds (48%) were BP raised, N=73 FP raised  
216 (51%) and N=2 birds (1%) were supplemented.

### 217 **Survival**

218 Survival was calculated for all individuals from fledging onwards. According to the cox  
219 proportional hazard model survival rates between stages across the whole population did not  
220 differ significantly (LRT,  $N = 736$ ,  $3.05$ ,  $p = 0.4$ ). Neither did they differ significantly  
221 between the sexes (LRT,  $N = 379$ ,  $0.8$ ,  $p = 0.4$ ). According to the Kaplan-Meier estimator,  
222 survival probability was for stage 1  $0.64 (\pm 0.36)$  for stage 2  $0.74 (\pm 0.35)$ , for stage 3  $0.69 (\pm$   
223  $0.35)$  and for stage 4  $0.78 (\pm 0.14)$ . The cumulative survival probability until sexual maturity  
224 (end of stage 3) was  $0.33 (\pm 0.23)$ . Concerning pre-fledging survival, 72% of the eggs  
225 hatched and 83% of the hatched chicks fledged (TABLE 2).

226 Table 2

227 Survival between the two raising types FP and BP differed (LRT,  $N = 375$ ,  $8.26$ ,  $p = 0.004$ ;  
228 FIGURE 3), also per stage and per raising type (LRT,  $N = 715$ ,  $10.17$ ,  $p = 0.04$ ). In stage 1 FP  
229 raised individuals showed a higher survival rate (FP =  $0.73 \pm 0.37$ , BP =  $0.52 \pm 0.30$ ), while  
230 in stage 4 BP raised adults showed a higher survival rate (FP =  $0.72 \pm 0.22$ , BP =  $0.92 \pm 0.17$ ;  
231 TABLE 1). The survival rates in the two colonies Burghausen and Kuchl did not significantly

232 differ, neither for the whole colonies (LRT,  $N = 216$ ,  $1.56$ ,  $p = 0.2$ ) nor per stage and per  
233 colony, respectively (LRT,  $N = 453$ ,  $5.36$ ,  $p = 0.3$ ; TABLE 1).

234 Figure 3

### 235 **Fecundity**

236 The number of nests increased steadily with 1 nest in 2011 and 14 nests in 2019, with a mean  
237 of  $3.43 (\pm 0.79)$  eggs per nest (TABLE 2). Overall fecundity was  $2.15$  fledglings per nest ( $\pm$   
238  $0.70$ ). Fecundity rates of females raised by human-foster parents and females raised by their  
239 bird parents (BP) in the wild did not differ significantly ( $z = 0.68$ ,  $p = 0.50$ ), neither fecundity  
240 rates among the colonies Burghausen and Kuchl ( $z = 0.60$ ,  $p = 0.55$ ).

241 The annual rate of reproducing adult females (s4) was  $0.61 (\pm 0.20)$ . From a total of 27  
242 potentially reproductive females  $N=13$  (48%) never reproduced till end of the data collection  
243 period,  $N=4$  (15%) reproduced once,  $N=4$  (15%) twice,  $N=5$  (19%) three times and  $N=1$  (4%)  
244 6 times.

### 245 **Population Viability Analysis**

#### 246 **Reproductive Rate**

247 Over the whole period of data collection, a total of 62 individuals reached stage 4. Analysing  
248 31 females of these 62 individuals of both sexes in stage 4 as potential mothers resulted in a  
249  $RR_{\text{Baseline}}$  of  $0.53 (\pm 0.17)$ ; TABLE 1) (wild BP and FP mothers and their female fledglings),  
250  $RR_{\text{Status Quo}}$  of  $1.41 (\pm 0.81)$  (additionally female fledglings from temporarily added females  
251 included) and  $RR_{\text{All Chicks}}$  of  $3.97 (\pm 2.66)$  (additionally human raised and released female  
252 fledglings included). These reproductive rates were used for the PVA.

253 **Management scenarios (MScen)**

254 Without further management and translocation measures, as assumed for the baseline  
255 scenario, the PVA indicates a lambda of 0.95 ( $\pm 0.030$ ), below the 1.0 threshold with 24%  
256 extinction probability within 50 years (TABLE 1).

257 The full factorial design resulted in 326 MScen (SUPPLEMENTARY MATERIAL 4). Across all  
258 326 MScen lambda ranged between 0.95 and 1.40. Lambda was  $>1$  and  $P_{EXT_{50}} \leq 5\%$  in 308  
259 out of 326 MScen (94 %), in all these 308 MScen the population did not go extinct. In a first  
260 analysis we investigated the frequencies of MScen with different demographic rates out of  
261 306 of 308 MScen with positive population development, to understand how demographic  
262 rates affect population viability (FIG. 4). The two MScen “Status quo” and “All chicks” were  
263 not considered here, because they were only simulated once with baseline survival values and  
264 the respective RR. In the 306 MScen with positive population development only s4 shifted to  
265 increasing survival values, as given by the improved MScen. An increase of s4 by 10% or  
266 25% increased the viability disproportionately (each 108 times) compared to the baseline  
267 value (90 times). These results indicate the importance of survival of the reproductive stage  
268 for population viability. This is supported by the GLMs and the ANOVA ranking the effect  
269 of the survival rates (deviance d of ANOVA:  $d_{s1} = 0.05$ ,  $d_{s2} = 0.05$ ,  $d_{s3} = 0.05$ ,  $d_{s4} = 0.68$ ).  
270 Here, s4 had the largest effect, together with reproductive rates (SUPPLEMENTARY MATERIAL  
271 5).

272 

|          |
|----------|
| Figure 4 |
|----------|

273 All MScen where RR was increased by 100% showed positive population development (81  
274 times). Only one MScen where RR was increased by 25% was rejected, i. e. the one where no  
275 survival rate was increased (i. e. baseline values for s1-s4, RR +25% MScen; TABLE 1). Still,

276 88% of the MScen with  $RR_{\text{Baseline}}$  showed positive population development (71 times). The  
277 reproductive rate had a strong effect on lambda, too ( $d_{RR} = 0.58$ ) in the GLMs.

278 In the second analysis 14 MScen of special management interest were analysed (TABLE 1,  
279 FIG. 5). For nine out of these, lambda was  $>1$  and  $P_{EXT\_50} \leq 5\%$ . If only RR was increased,  
280 positive population growth only occurred from an increase of at least 100% (“+100% RR”,  
281 “Status quo”, “All Chicks”), i. e. a minimum of one female fledgling per female. Increasing  
282 only the survival of juveniles  $s_1$  did not lead to positive population growth but increasing  
283 adult survival  $s_4$  did. An increase in all survival values  $s_1$ - $s_4$  also led to positive population  
284 growth; these effects were reinforced by an additional increase in the reproductive rate.

### 285 **Stochastic event and juvenile supplement scenarios (SJS)**

286 Here we developed 820 scenarios, taking 11 MScens: nine MScen of special interest where  
287 lambda  $>1$  and  $P_{EXT\_50} \leq 5\%$ , the  $S_{\text{Base}}$  scenario and once the "All chicks" scenario without the  
288 supplements, as the supplements are already included in the  $RR_{\text{All Chicks}}$  (see under  
289 SUPPLEMENTARY MATERIAL 2). The number of SJS is given by the equation in  
290 SUPPLEMENTARY MATERIAL 4. Lambda was between 0.91 and 1.40. In 714 out of 820 SJS  
291 (87 %) lambda was  $>1$  and  $P_{EXT\_50} \leq 5\%$ . Baseline survival values led to positive population  
292 growth in 74-79% of the SJS. Increase of survival of adults (stage 4) by 10% led to positive  
293 population growth in 89% of the SJS, while 10% survival increase in other age categories led  
294 to population growth in 100% of the SJS considered. Increasing baseline survival by 25% led  
295 to positive population growth in 100% of the SJS.

296 Each combination of stochastic event frequencies and severities occurred 41 times in all 820  
297 SJS. 90% of the SJS with low frequency (5%) and severity (5%) of stochastic events and also  
298 80% of the SJS with high frequency (20%) and severity (25%) of stochastic event resulted in  
299 positive population development (FIG. 5). 88% of the SJS with 30 supplemented juveniles per

300 year over 7 years and also 86% of the SJS with 15 supplements per year over 4 years resulted  
301 in positive population development.

302 Figure 5

## 303 **Discussion**

304 This paper presents an analysis of demographic development, survival, and reproduction of a  
305 reintroduced Northern Bald Ibis population. It covers a period of 12 years, including the late  
306 phase of a research project (2008-2013), where small number of birds were released, and the  
307 following six-year period of the LIFE+ funded reintroduction project (2014-2019).

308 The comprehensive 12-year data set allowed a Population Viability Analysis (PVA) of the  
309 future population development under different scenarios. PVA is a powerful mean to evaluate  
310 the effectiveness of reintroduction and management scenarios. Such models based on the best  
311 possible evidence are recommended in the IUCN reintroduction guidelines to decide on  
312 further management (IUCN/SSC, 2013b).

## 313 **Survival**

314 Survival rate of the *Waldrappteam* population is ranging from 64% for juveniles (stage 1) to  
315 78% for adults (stage 4). A matching adult survival rate of 81% is published for a small  
316 migratory NBI relict population, which was discovered in the Middle East in 2002 (Serra et  
317 al., 2014). Since the Moroccan birds are not marked, their survival rate can only be estimated  
318 due to the annual counts of the pre-breeding population and the number of fledglings  
319 (Bowden et al., 2008). This results in an overall annual survival rate of 77%, what is also in  
320 accordance with the calculated rates of the *Waldrappteam* population.

321 The cumulative survival rate of the *Waldrappteam* population until sexual maturity (stage 1  
322 to 3) was 33%. In the Middle East relict population, the count of departing fledglings and

323 arriving new breeders at the breeding site in Syria indicates 14% survival rate until sexual  
324 maturity (Boehm et al., 2020), what it less than half the rate of the *Waldrappteam* population.  
325 Satellite-tracking of the Middle East juveniles revealed, that they did not arrive at the  
326 common wintering site in Ethiopia, because they lost the company of experienced  
327 conspecifics and died at the Arabic Peninsula (Serra et al., 2014). This low survival rate of  
328 juveniles was a major cause for the extinction of this population in 2013, despite international  
329 conservation and translocation efforts (Fritz & Riedler, 2010; Bowden et al., 2012; Serra,  
330 2015).

331 In our population, first-year survival of foster-parent raised and released juveniles (73%; FP)  
332 was significantly higher compared to bird-parent raised juveniles (52%; BP). This contrasts  
333 the widespread experience that released individuals have comparably low survival rates,  
334 particularly in the first period after release, due to translocation and competition induced  
335 stress, dispersal, diseases or predation (Parker et al., 2013), wherein this is true in particular  
336 for captive-bred individuals, probably because they lack individual experiences (Mathews et  
337 al., 2005). Our birds undergo an extensive pre-release training, which provides them with  
338 essential experiences regarding navigation, flight techniques, weather conditions,  
339 aerodynamics and predator avoidance (Portugal et al., 2014; Voelkl & Fritz, 2017; Fritz,  
340 Unsoeld, et al., 2019). This is assumed to improve post-release viability (Alonso et al., 2011;  
341 Houser et al., 2011; Zhang et al., 2017). In a Spanish NBI reintroduction project (*Proyecto*  
342 *Eremita*), the mean first-year survival rate for released juveniles was substantially lower with  
343 31% (Boehm et al., 2020; data from 2004-2018), compared to the *Waldrappteam* population.  
344 We assume that minor pre-release training and unguided autumn dispersal (Muñoz &  
345 Ramírez, 2017) account for the strongly deviating survival rate of the juveniles released in  
346 Spain (Fritz, Unsoeld, et al., 2019).

347 The survival rate from hatching to fledging in the *Waldrappteam* population is 83%, what is  
348 substantially higher compared to a given value of 47% for the Morocco wild population  
349 (Bowden et al., 2003). We assume this difference to be mainly related to the quality of the  
350 feeding habitats. For the European birds, studies indicate a high feeding efficiency and a  
351 correspondingly high abundancy of food animals (mainly worms and larvae) in the soil of  
352 meadows and pastures as the preferred feeding habitats (Zoufal et al., 2007; Fritz et al., 2017)  
353 while the feeding habitats at the Atlantic coast in Morocco consist of semi-natural steppes  
354 with sparse cover of perennial and annual vegetation and low availability of fresh water  
355 sources (Bowden et al., 2008). Accordingly, position data indicate a small activity range of  
356 about two kilometres radius around the nesting sites for the European birds during the  
357 breeding season (Fritz et al., 2016) while the foraging area of the two Moroccan colonies  
358 covers a strip of about 4 km inland along 50 km coastline. The fledgling survival rate in  
359 Morocco was even lower in the 90's before supplementary fresh water was provided near to  
360 the breeding grounds from 1998 on (Smith et al., 2008).

### 361 **Fecundity**

362 In the *Waldrappteam* population 61% of the mature females (stage 4) actually reproduce. The  
363 majority of the non-reproducing females remain at the wintering site. In comparison, 63% of  
364 the *full-grown* birds in the Moroccan population reproduce (Bowden et al., 2008). These rates  
365 are not directly comparable, because the Moroccan data are based on counts of un-marked  
366 birds. But the data indicate that also in this sedentary population with all birds on site a  
367 similar proportion of the adults is not reproducing.

368 In the *Waldrappteam* population, the average annual fecundity was 2.15 fledged chicks per  
369 nest. TABLE 3 outlines fecundity values for other NBI populations, based on data published in  
370 (Boehm et al., 2020). The values vary considerably, with 1.23 fledged chicks per nest in the



371 wild sedentary Moroccan population and 0.97 in the Spanish *Proyecto Eremita* population  
372 (release sedentary). The highest rate with 2.24 refers to the semi-wild managed population at  
373 Zoo Rosegg in Austria. The comparison indicates that fecundity in the *Waldrappteam*  
374 population is at the upper end, which in consistence with the high survival rate from hatching  
375 to fledging (83%) and indicates a high quality of the breeding habitats. The rate of 1.67 for a  
376 Chinese sedentary release population of the Crested ibis (*Nipponia nippon*) lies in the range  
377 of the NBI populations.

378 Table 3

### 379 **Population Viability Analysis**

380 Due to the outcome of the PVA baseline scenario, with lambda 0.95 and 24% extinction  
381 probability within 50 years, the hypothesis that this reintroduced NBI population can survive  
382 without further management and release at the end of the data collection period (2019) is to  
383 be rejected. This result is not unexpected because the reintroduction project started just in  
384 2014 and is still ongoing. Nonetheless, the population is already close to transition into a state  
385 of self-growth (with lambda >1.0) what also coincides with the comparatively good survival  
386 and fecundity values.

387 The baseline reproductive rate relates the actual number of fledged female offspring to the  
388 entirety of adult females (s4) in the population, including the 39% non-reproducing females.  
389 It is an expression of the reproductive potential in the population. The given baseline rate of  
390 0.53 can be significantly increased by translocations measures, up to a rate of 3.97 ( $RR_{All}$   
391  $Chicks$ ). As indicated by the management improvement scenarios continuing with the given  
392 translocation measures has the most significant immediate effect on lambda and extinction  
393 probability (TABLE 1). In comparison, an increase in the survival rate has a relatively small

394 effect on lambda, where improvement in the survival rate of adults (s4) has the greatest  
395 impact. This is common knowledge and has also been confirmed for other long-lived species  
396 (Lebreton & Clobert, 1991; Lampila et al., 2006; Pistorius et al., 2006; Schaub et al., 2009;  
397 O’Shea et al., 2011). Sustainable improvement of the survival on long-term should be an  
398 objective for the project, even though intraspecific comparison indicates that in the  
399 *Waldrappteam* population survival values are already in a good range for all age categories.

400 The simulation of stochastic event scenarios with different frequency and severity led to only  
401 a slight impairment of the population development. The simulations also indicated that  
402 increasing survival or fecundity could mitigate the effect of stochastic events.

## 403 **Conclusion**

404 Despite comparatively good survival and fecundity data the PVA indicated that the  
405 *Waldrappteam* population needs further management and translocation. It is important at this  
406 stage to plan the kind and duration of further management and translocation measures based  
407 on a quantitative, systematic analysis.

408 According to the modelling outcome, a major focus of future management of the release  
409 population will be on further improvement of the survival rates with particular focus on  
410 adults (stage 4). This will mainly be achieved by the implementation of measures against the  
411 major mortality causes, illegal hunting in Italy and electrocution on unsecured power poles at  
412 the breeding sites (Fritz, 2015; Fritz et al., 2019). Also, the proportion of reproducing females  
413 (61%) should be increased by the establishment of a breeding site south of the Alps which  
414 can be easily reached in spring without crossing the Alpine chain.

415 An interspecific comparison of the demographic data did not indicate adverse effects of the  
416 migratory lifestyle in the *Waldrappteam* population. The survival rate of adults is similar to

417 sedentary populations and the survival rate of released juveniles is even substantially higher  
418 in the migratory population (73%) compared to a sedentary population in Spain (31%).

419 The high fecundity rate in the *Waldrappteam* population (2.15) is presumably a consequence  
420 of the migratory behaviour that allows the adults to exploit rich northern feeding grounds  
421 during the reproduction period.

422 The actual *International Single Species Action Plan* for the NBI (Bowden 2015) does not  
423 include modelling, neither as an objective nor as a recommendation. This indicates that  
424 systematic, quantitative approaches, such as the PVA, are still not well established and  
425 recognizes as a strategic tool for animal conservation. The study presented here show that the  
426 PVA could essentially contribute to the improvement of conservation measures for this and  
427 other endangered animal species and populations.

428 The model could be improved by including movement of the NBI in the PVA assessment to  
429 build a spatially explicit population simulation model accounting for differences in the  
430 migration routes from and to the colonies. In addition, a thorough assessment of the factors  
431 significantly influencing the viability of the NBI in the colonies would be an asset, such as  
432 the availability of food or nesting sites, the weather in the breeding areas, during the  
433 migration and in the winter area (Schaub et al., 2005).

#### 434 **Author contribution**

435 SD, SKS and JF conceived and designed the study, SD and VR analysed data, SD led the  
436 writing, CS supported programming, and CE collected field data. SKS, JF, IK and VR  
437 substantially contributed to the writing.

438 **Acknowledgements**

439 The Waldrapteam is co-financed with a 50% contribution from the LIFE financial  
440 instrument of the European Union (LIFE+12-BIO\_AT\_000143, LIFE Northern Bald Ibis).  
441 SD, VR, CD and SKS are associated with the DFG funded research training group  
442 „BioMove“ (RTG 2118-1).

443 **Conflicts of interest**

444 None.

445 **Ethical standards**

446 This research followed the *Oryx* guidelines on ethical standards.

447

## 448 **References**

- 449 ALONSO, R., OREJAS, P., LOPES, F. & SANZ, C. (2011) Pre-release training of juvenile little  
450 owls *Athene noctua* to avoid predation. *Animal Biodiversity and Conservation*, 34, 389–  
451 393.
- 452 BENNETT, V.A., DOERR, V.A.J., DOERR, E.D., MANNING, A.D., LINDENMAYER, D.B. &  
453 YOON, H.J. (2013) Causes of reintroduction failure of the brown treecreeper:  
454 Implications for ecosystem restoration. *Austral Ecology*.
- 455 BOEHM, C., BOWDEN, C.G.R., SEDDON, P.J., HATIPOĞLU, T., OUBROU, W., EL BEKKAY, M., ET  
456 AL. (2020) The northern bald ibis *Geronticus eremita*: history, current status and future  
457 perspectives. *Oryx*, 1–13.
- 458 BOWDEN, C.G.R., AGHNAJ, A., SMITH, K.W. & RIBI, M. (2003) The status and recent  
459 breeding performance of the critically endangered Northern Bald Ibis *Geronticus*  
460 *eremita* population on the Atlantic coast of Morocco. *Ibis*, 145, 419–431.
- 461 BOWDEN, C.G.R., HAMOUD, A., JBOUR, S., FRITZ, J., PESKE, L., RIEDLER, B., ET AL. (2012)  
462 Attempted supplementation of the relict wild Eastern population of Northern Bald Ibis in  
463 Syria with Turkish semi-wild juveniles. *IUCN Reintroduction Specialists Group Case*  
464 *Studies Part III*, 130-134.
- 465 BOWDEN, C.G.R., SMITH, K.W., BEKKAY, M. EL, OUBROU, W., AGHNAJ, A. & JIMENEZ-  
466 ARMESTO, M. (2008) Contribution of research to conservation action for the Northern  
467 Bald Ibis *Geronticus eremita* in Morocco. *Bird Conservation International*, 18, 74–90.
- 468 CORLETT, R.T. (2016) Restoration, Reintroduction, and Rewilding in a Changing World.  
469 *Trends in Ecology and Evolution*. .
- 470 DESTRO, G.F.G., DE MARCO, P. & TERRIBILE, L.C. (2018) Threats for bird population  
471 restoration: A systematic review. *Perspectives in Ecology and Conservation*, 16, 68–73.
- 472 FREY, H. (1992) Die Wiedereinbürgerung des Bartgeiers (*Gypaetus barbatus*) in den Alpen.  
473 *Egretta*, 35, 85–95.
- 474 FRITZ, J. (2015) Reintroduction of the Northern Bald Ibis in Europe: Illegal Hunting in Italy  
475 during Autumn Migration as the Main Threat. *WAZA Magazin*, 31 p.
- 476 FRITZ, J., HOFFMANN, W. & UNSÖLD, M. (2016) Back into European ecosystems: The LIFE  
477 + Northern Bald Ibis reintroduction project in Central Europe. In *Report of 4th IAGNBI*  
478 *Meeting Seekirchen (Ed. C Böhm & C Bowden)*.
- 479 FRITZ, J., KRAMER, R., HOFFMANN, W., TROBE, D. & UNSÖLD, M. (2017) Back into the wild:  
480 establishing a migratory Northern bald ibis *Geronticus eremita* population in Europe.  
481 *International Zoo Yearbook*, 51, 107–123.
- 482 FRITZ, J. & RIEDLER, B. (2010) Neue Hoffnung für das Überleben einer hoch bedrohtesten  
483 Zugvogelart im Mittleren Osten: Freisetzung von Jungvögeln bei den letzten  
484 migrierenden Waldrappen in Syrien. *Vogelwarte*, 48, 417–418.
- 485 FRITZ, J., UNSOELD, M. & VOELKL, B. (2019) Back into European Wildlife: The  
486 Reintroduction of the Northern Bald Ibis (*Geronticus eremita*). In *Scientific Foundations*

- 487        *of Zoos and Aquariums: Their Role in Conservation and Research* (eds A. Kaufman, M.  
488        Bashaw & T. Maple), pp. 339–366. Cambridge University Press.
- 489        FRITZ, J., WIRTZ, S. & UNSOELD, M. (2017) Aspekte der Nahrungsökologie und Genetik des  
490        Waldrapps □: Reply zu Bauer et al. (2016) Vogelneozoen in Deutschland - Revision  
491        der nationalen Stauseinstufungen. *Vogelwarte*, 55, 141–145.
- 492        GRAY, T.N.E., CROUTERS, R., RAMESH, K., VATTAKAVEN, J., BORAH, J., PASHA, M.K.S., ET  
493        AL. (2017) A framework for assessing readiness for tiger *Panthera tigris* reintroduction:  
494        a case study from eastern Cambodia. *Biodiversity and Conservation*, 26, 2383–2399.
- 495        GRIMM, V., AUGUSIAK, J., FOCKS, A., FRANK, B.M., GABSI, F., JOHNSTON, A.S.A., ET AL.  
496        (2014) Towards better modelling and decision support: Documenting model  
497        development, testing, and analysis using TRACE. *Ecological Modelling*, 280, 129–139.  
498        Elsevier B.V.
- 499        GRIMM, V., BERGER, U., BASTIANSEN, F., ELIASSEN, S., GINOT, V., GISKE, J., ET AL. (2006) A  
500        standard protocol for describing individual-based and agent-based models. *Ecological*  
501        *Modelling*, 198, 115–126.
- 502        GRIMM, V., BERGER, U., DEANGELIS, D.L., POLHILL, J.G., GISKE, J. & RAILSBACK, S.F.  
503        (2010) The ODD protocol: A review and first update. *Ecological Modelling*, 221, 2760–  
504        2768.
- 505        HOUSER, A.M., GUSSET, M., BRAGG, C.J., BOAST, L.K. & SOMERS, M.J. (2011) Pre-release  
506        hunting training and post-release monitoring are key components in the rehabilitation of  
507        orphaned large felids. *African Journal of Wildlife Research*, 41, 11–20.
- 508        IUCN/SSC (2013a) Guidelines for Reintroductions and Other Conservation Translocations.  
509        IUCN Species Survival Commission, Gland, Switzerland.
- 510        IUCN/SSC (2013b) Guidelines for Reintroductions and Other Conservation Translocations.  
511        Version 1.0. Gland, Switzerland.
- 512        KAPLAN, E.L. & MEIER, P. (1958) Nonparametric Estimation from Incomplete Observations.  
513        *Journal of the American Statistical Association*, 53, 457–481.
- 514        KLEINBAUM, D.G. & KLEIN, M. (2012) Survival analysis: A Self-Learning Text, 3rd edition.  
515        Springer Science+Business Media.
- 516        LAMPILA, S., ORELL, M., BELDA, E. & KOIVULA, K. (2006) Importance of adult survival,  
517        local recruitment and immigration in a declining boreal forest passerine, the willow tit  
518        *Parus montanus*. *Oecologia*, 148, 405–413.
- 519        LEBRETON, J.D. & CLOBERT, J. (1991) Bird population dynamics, management, and  
520        conservation: the role of mathematical modelling. In *Bird population studies* (eds C.M.  
521        Perrins, J.D. Lebreton & G.J.M. Hirons), pp. 105–125. Oxford University Press, Oxford.
- 522        MATHEWS, F., ORROS, M., MCLAREN, G., GELLING, M. & FOSTER, R. (2005) Keeping fit on  
523        the ark: Assessing the suitability of captive-bred animals for release. *Biological*  
524        *Conservation*, 121, 569–577.
- 525        MUÑOZ, A.-R. & RAMÍREZ, J. (2017) Reintroduced northern bald ibises from Spain reach

- 526 Morocco. *Oryx*, 51, 204–205.
- 527 O'SHEA, T.J., ELLISON, L.E. & STANLEY, T.R. (2011) Adult survival and population growth  
528 rate in Colorado big brown bats (*Eptesicus fuscus*). *Journal of Mammalogy*, 92, 433–  
529 443.
- 530 PARKER, K.A., EWEN, J.G., SEDDON, P.J. & ARMSTRONG, D.P. (2013) Post-release  
531 monitoring of bird translocations: Why is it important and how do we do it? *Notornis*,  
532 60, 85–92.
- 533 PEREIRA, H.M. & NAVARRO, L.M. (eds) (2015) Rewilding European Landscapes. In  
534 *Rewilding European Landscapes* p. , 1st edition. Springer International Publishing,  
535 Cham.
- 536 PETTORELLI, N., BARLOW, J., STEPHENS, P.A., DURANT, S.M., CONNOR, B., SCHULTE TO  
537 BÜHNE, H., ET AL. (2018) Making rewilding fit for policy. *Journal of Applied Ecology*,  
538 55, 1114–1125.
- 539 PISTORIUS, P.A., FOLLESTAD, A. & TAYLOR, F.E. (2006) Declining winter survival and fitness  
540 implications associated with latitudinal distribution in Norwegian Greylag Gese Anser  
541 anser. *Ibis*, 148, 114–125.
- 542 PORTUGAL, S.J., HUBEL, T.Y., FRITZ, J., HEESE, S., TROBE, D., VOELKL, B., ET AL. (2014)  
543 Upwash exploitation and downwash avoidance by flap phasing in ibis formation flight.  
544 *Nature*, 505, 399–402.
- 545 R CORE TEAM (2020) R: A language and environment for statistical computing. R Foundation  
546 for Statistical Computing, Vienna, Austria.
- 547 ROBERT, A., COLAS, B., GUIGON, I., KERBIRIOU, C., MIHOUB, J.B., SAINT-JALME, M. &  
548 SARRAZIN, F. (2015) Defining reintroduction success using IUCN criteria for threatened  
549 species: A demographic assessment. *Animal Conservation*, 18, 397–406.
- 550 SCHAUB, M., KANIA, W. & KÖPPEN, U. (2005) Variation of primary production during winter  
551 induces synchrony in survival rates in migratory white storks *Ciconia ciconia*. *Journal of*  
552 *Animal Ecology*, 74, 656–666.
- 553 SCHAUB, M., ZINK, R., BEISSMANN, H., SARRAZIN, F. & ARLETTAZ, R. (2009) When to end  
554 releases in reintroduction programmes: Demographic rates and population viability  
555 analysis of bearded vultures in the Alps. *Journal of Applied Ecology*, 46, 92–100.
- 556 SERRA, G. (2015) The Northern Bald Ibis is extinct in the Middle East - but we can't blame it  
557 on IS. *Ecologist*.
- 558 SERRA, G., LINDSELL, J.A., PESKE, L., FRITZ, J., BOWDEN, C.G.R., BRUSCHINI, C., ET AL.  
559 (2014) Accounting for the low survival of the Critically Endangered northern bald ibis  
560 *Geronticus eremita* on a major migratory flyway. *Oryx*, 49, 312–320.
- 561 SMITH, K.W., AGHNAJ, A., EL BEKKAY, M., OUBROU, W., RIBI, M., ARMESTO, M.J. &  
562 BOWDEN, C.G.R. (2008) The provision of supplementary fresh water improves the  
563 breeding success of the globally threatened Northern Bald Ibis *Geronticus eremita*. *Ibis*,  
564 150, 728–734.

- 565 SOORAE, P.S. (2018) Global Reintroduction Perspectives -2018; Case studies from around the  
566 globe. IUCN/SSC Re-introduction Specialist Group & Environment Agency-ABU  
567 DHABI, Gland, Switzerland.
- 568 SPERGER, C., HELLER, A., VOELKL, B. & FRITZ, J. (2017) Flight Strategies of Migrating  
569 Northern Bald Ibises – Analysis of GPS Data During Human-led Migration Flights.  
570 *AGIT □ Journal für Angewandte Geoinformatik*, 3, 62–72.
- 571 THERNEAU, T.M. (2015) A Package for Survival Analysis in R.
- 572 VOELKL, B. & FRITZ, J. (2017) Relation between travel strategy and social organization of  
573 migrating birds with special consideration of formation flight in the northern bald ibis.  
574 *Philosophical Transactions of the Royal Society B: Biological Sciences*, 372, 20160235.
- 575 WILENSKY, U. (1999) NetLogo. Center for Connected Learning and Computer-Based  
576 Modeling, Northwestern University, Evanston, IL.
- 577 WIMBERGER, K., DOWNS, C.T. & PERRIN, M.R. (2009) Two Unsuccessful Reintroduction  
578 Attempts of Rock Hyraxes (*Procavia capensis*) into a Reserve in the KwaZulu-Natal  
579 Province, South Africa. *African Journal of Wildlife Research*, 39, 192–201.
- 580 WIRTZ, S., BOEHM, C., FRITZ, J., KOTRSCHAL, K., VEITH, M. & HOCHKIRCH, A. (2018)  
581 Optimizing the genetic management of reintroduction projects: Genetic population  
582 structure of the captive Northern Bald Ibis population Sarah Wirtz. *Conservation*  
583 *Genetics*, 19, 853–864.
- 584 ZHANG, M., HUANG, Y., HONG, M., ZHOU, S., HUANG, J., LI, D., ET AL. (2017) Impacts of  
585 man-made provisioned food on learned cub behaviours of giant pandas in pre-release  
586 reintroduction training. *Folia Zoologica*, 66, 58–66.
- 587 ZOUFAL, K., FRITZ, J., BICHLER, M., KIRBAUER, M., MARKUT, T., MERAN, I., ET AL. (2007)  
588 Feeding ecology of the Northern Bald Ibis in different habitat types: An experimental  
589 field study with handraised individuals. In *Report of the 2nd IAGNBI Meeting* p. .
- 590
- 591



592 **Table 1**

593 In the upper part, the table shows the given empirical values for survival per stage and for the  
 594 three reproductive rates as defined in the text. These values and their improvements by 10%,  
 595 25% or 100% were used in different combinations for the NetLogo simulation of 14  
 596 management improvement scenarios, as outlined in the lower part of the table. Improvement  
 597 of the empirical values are indicated by bold numbers. The resulting Lambda and extinction  
 598 probability ( $P_{EXT\_50}$ ) are shown in the two right columns. Please note that reproductive rate  
 599 comprises not only the reproducing females but all adult females in stage 4 and takes into  
 600 account only to female offspring. In brackets: Standard deviation.

| Results and PVA scenarios/stage                                       | s1           | s2           | s3           | s4           | Reproductive rate (females) | Lambda        | $P_{EXT\_50}$ |
|-----------------------------------------------------------------------|--------------|--------------|--------------|--------------|-----------------------------|---------------|---------------|
| Empirical values                                                      |              |              |              |              |                             |               |               |
| RR <sub>Baseline</sub>                                                | 0.64 (±0.36) | 0.74 (±0.35) | 0.69 (±0.35) | 0.78 (±0.14) | 0.53 (±0.17)                |               |               |
| RR <sub>Status quo</sub>                                              |              |              |              |              | 1.41 (±0.81)                |               |               |
| RR <sub>All chicks</sub>                                              |              |              |              |              | 3.97 (±2.66)                |               |               |
| Management improvement scenarios I - 14 scenarios of special interest |              |              |              |              |                             |               |               |
| Baseline (RR <sub>Baseline</sub> )                                    | 0.64         | 0.74         | 0.69         | 0.78         | 0.53                        | 0.95 (±0.030) | 24%*          |
| +10% RR                                                               | 0.64         | 0.74         | 0.69         | 0.78         | <b>0.58</b>                 | 0.97 (±0.015) | 3%            |
| +25% RR                                                               | 0.64         | 0.74         | 0.69         | 0.78         | <b>0.66</b>                 | 0.99 (±0.013) | 0%            |
| +100% RR                                                              | 0.64         | 0.74         | 0.69         | 0.78         | <b>01.Jun</b>               | 1.07 (±0.005) | 0%            |
| +10% s1                                                               | <b>0.70</b>  | 0.74         | 0.69         | 0.78         | 0.53                        | 0.97 (±0.020) | 1%            |
| +25% s1                                                               | <b>0.80</b>  | 0.74         | 0.69         | 0.78         | 0.53                        | 0.99 (±0.014) | 1%            |
| +10% s4                                                               | 0.64         | 0.74         | 0.69         | <b>0.86</b>  | 0.53                        | 1.02 (±0.007) | 0%            |
| +25% s4                                                               | 0.64         | 0.74         | 0.69         | <b>0.98</b>  | 0.53                        | 1.10 (±0.004) | 0%            |
| +10% s1-s4                                                            | <b>0.70</b>  | <b>0.81</b>  | <b>0.76</b>  | <b>0.86</b>  | 0.53                        | 1.05 (±0.006) | 0%            |
| +25% s1-s4                                                            | <b>0.80</b>  | <b>0.92</b>  | <b>0.86</b>  | <b>0.98</b>  | 0.53                        | 1.19 (±0.005) | 0%            |
| +10% s1-s4 and RR                                                     | <b>0.70</b>  | <b>0.81</b>  | <b>0.76</b>  | <b>0.86</b>  | <b>0.58</b>                 | 1.07 (±0.005) | 0%            |
| +25% s1-s4 and RR                                                     | <b>0.80</b>  | <b>0.92</b>  | <b>0.86</b>  | <b>0.98</b>  | <b>0.66</b>                 | 1.23 (±0.004) | 0%            |
| Status quo (RR <sub>Status quo</sub> )                                | 0.64         | 0.74         | 0.69         | 0.78         | Jän.41                      | 1.13 (±0.006) | 0%            |
| All chicks (RR <sub>All chicks</sub> )                                | 0.64         | 0.74         | 0.69         | 0.78         | Mär.97                      | 1.40 (±0.012) | 0%            |

601  
602

\* For a simulation across 100 years the extinction probability would be 87%.

603

604 **Table 2**

605 Breeding statistics of the *Waldrapteam* population: in brackets: Standard deviation.

| Year         | Number of nests per year | Developmental stage |                      |                   |                      |                   |                      |
|--------------|--------------------------|---------------------|----------------------|-------------------|----------------------|-------------------|----------------------|
|              |                          | Eggs                |                      | Hatchlings        |                      | Fledglings        |                      |
|              |                          | Total number        | Mean per nest        | Total number      | Mean per nest        | Total number      | Mean per nest        |
| 2011         | 1                        | 3                   | 3.00 (NA)            | 3                 | 3.00 (NA)            | 3                 | 3.00 (NA)            |
| 2012         | 5                        | 11                  | 2.20 (± 1.30)        | 9                 | 1.80 (± 1.10)        | 8                 | 1.60 (± 1.34)        |
| 2013         | 7                        | 23                  | 3.29 (± 0.76)        | 9                 | 1.29 (± 1.25)        | 6                 | 0.86 (± 1.21)        |
| 2014         | 8                        | 23                  | 2.88 (± 0.64)        | 15                | 1.88 (± 0.64)        | 13                | 1.63 (± 0.74)        |
| 2015         | 6                        | 19                  | 3.17 (± 0.75)        | 19                | 3.17 (± 0.75)        | 17                | 2.83 (± 0.75)        |
| 2016         | 6                        | 30                  | 5.00 (± 2.45)        | 15                | 2.50 (± 1.64)        | 13                | 2.17 (± 1.47)        |
| 2017         | 9                        | 35                  | 3.89 (± 1.62)        | 24                | 2.67 (± 1.41)        | 18                | 2.00 (± 1.66)        |
| 2018         | 10                       | 37                  | 3.70 (± 0.48)        | 32                | 3.20 (± 0.79)        | 26                | 2.60 (± 0.52)        |
| 2019         | 14                       | 53                  | 3.79 (± 1.12)        | 43                | 3.07 (± 1.64)        | 37                | 2.64 (± 1.50)        |
| <b>Total</b> | <b>66</b>                | <b>234</b>          | <b>3.43 (± 0.79)</b> | <b>169</b>        | <b>2.51 (± 0.70)</b> | <b>141</b>        | <b>2.15 (± 0.70)</b> |
| Survival     |                          |                     |                      | 0.72 <sup>1</sup> |                      | 0.83 <sup>2</sup> |                      |

606

607 <sup>1</sup> percent of eggs hatched; <sup>2</sup> percent of hatchlings fledged.

608

609

610 **Table 3**

611 Comparative statistics on fecundity with mean number of fledglings per nest. SD = standard  
612 deviation. Bottom line Crested Ibis (*Nipponia nippon*).

| Species      | Population, Country (period)                | Population type    | Mean fledglings    | Source            |
|--------------|---------------------------------------------|--------------------|--------------------|-------------------|
| NBI          | <i>Waldrappteam</i> , Europe (2008-2019)    | release migratory  | 2.15 ( $\pm$ 0.70) | Actual analysis   |
| NBI          | Rosegg, Austria (2005-2016) <sup>2</sup>    | semi-wild, managed | 2.24 ( $\pm$ 0.32) | Böhm et al., 2020 |
| NBI          | <i>Proyecto Eremita</i> , Spain (2008-2018) | release sedentary  | 0.97 ( $\pm$ 0.49) | Böhm et al., 2020 |
| NBI          | Birecik, Turkey (2006-2018)                 | semi-wild, managed | 1.53 ( $\pm$ 0.20) | Böhm et al., 2020 |
| NBI          | Palmyra, Syria (2002-2012)                  | wild migratory     | 1.38 ( $\pm$ 1.13) | Böhm et al., 2020 |
| NBI          | KLF <sup>1</sup> , Austria (2001-2016)      | semi-wild, managed | 1.25 ( $\pm$ 0.54) | Böhm et al., 2020 |
| NBI          | Morocco total (2006-2018)                   | wild sedentary     | 1.23 ( $\pm$ 0.31) | Böhm et al., 2020 |
| Crested Ibis | Qinling Mountains, China (2007-2014)        | release sedentary  | 1.67 ( $\pm$ 0.17) | Wang et al., 2017 |

613  
614 <sup>1</sup> Konrad-Lorenz research station, core facility University of Vienna.

615 <sup>2</sup> Date from 2012 and 2013 were excluded due to brood control.

616

617 **Figure 1**

618 Study site of Northern Bald Ibis in Europe. a) Location of the study area in Europe. b) Closer  
619 look on two already established breeding sites (pink) in Burghausen (Bavaria, Germany) and  
620 Kuchl (State of Salzburg, Austria) and new colonies in Ueberlingen (Baden-Württemberg,  
621 Germany; pink) and Rosegg (Kärnten, Austria) with released NBI. The common wintering  
622 ground is the WWF Oasi Laguna di Orbetello in Tuscany, Italy (blue). Black lines: migration  
623 routes.

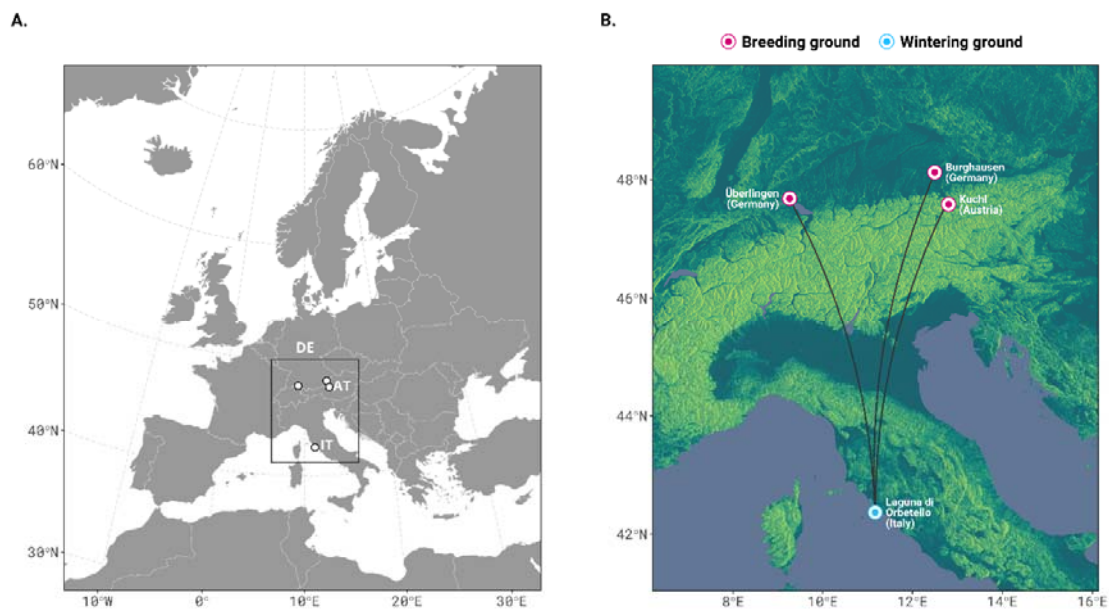

624  
625

626 **Figure 2**

627 Life cycle graph of the Northern Bald Ibis. Life stages are in circles, for definition see text; s1  
628 to s4 are the survival probability of the regarding stages; light grey section: biological parent  
629 (BP) raised proportion of the population; dark grey section: human foster parent (FP) raised  
630 part of the population; A<sub>SP</sub>: temporarily added females. Only the female part of the  
631 population is considered for the simulations.

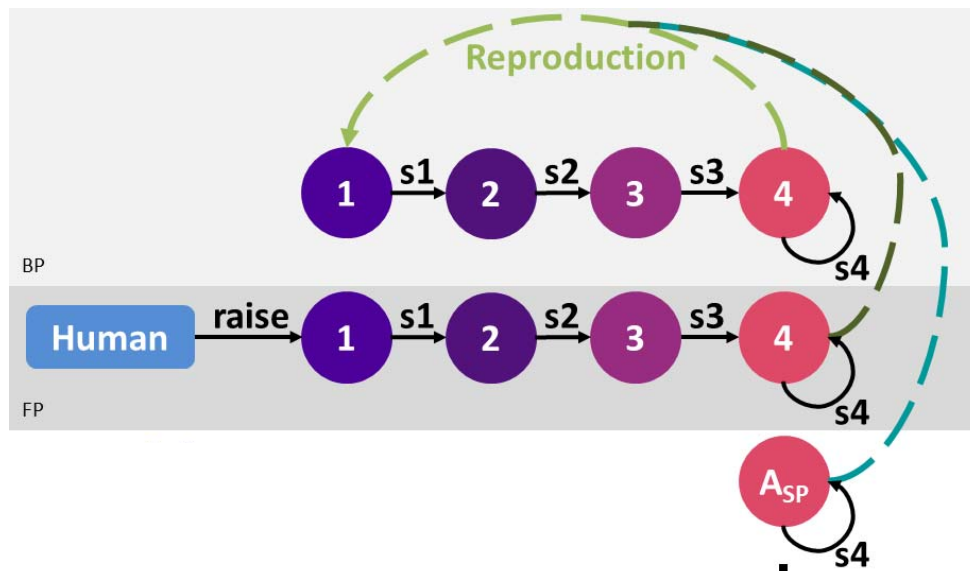

632

633 **Figure 3**

634 Survival plot of the raising types. The p-values are the results of the LRT. Shades of the lines

635 represent the standard deviation.

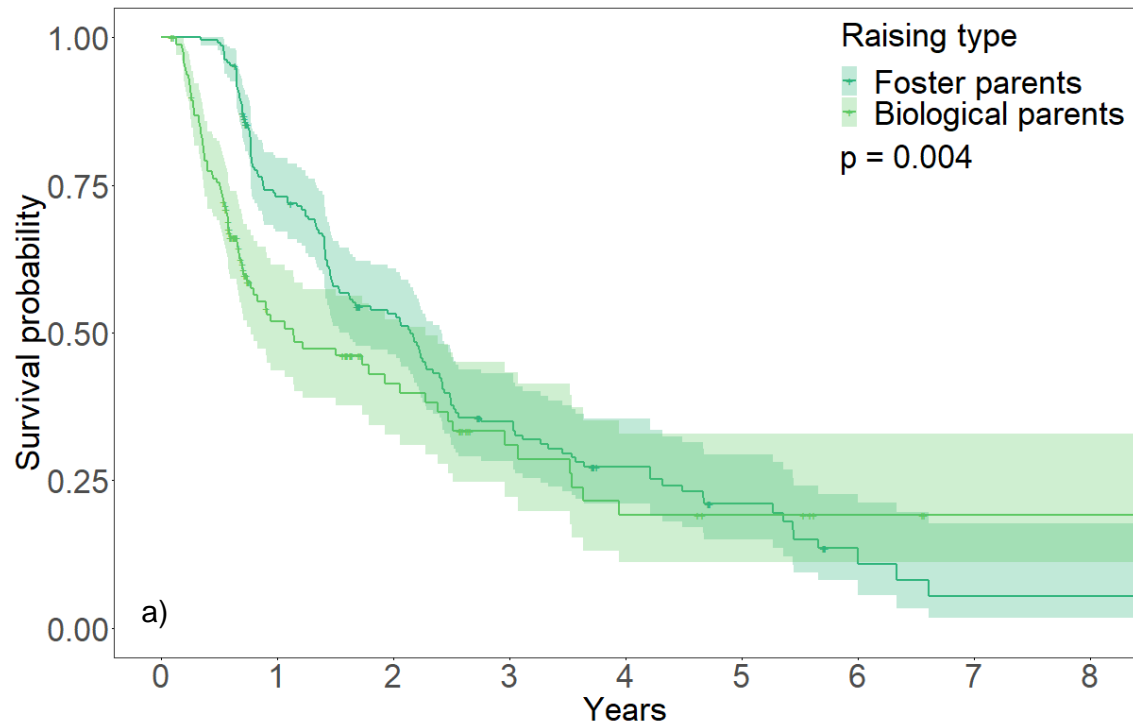

636

637 **Figure 4**

638 Number of females per year in the 14 scenarios of special interest. Each line of a facet  
639 corresponds to a run of the respective scenario. The bold black line represents the average of  
640 all 100 runs per scenario. Lambda  $\pm$  standard deviation are specified for each scenario. The  
641 description of each scenario can be found in the heading of the facet. s1-s4 are the survival  
642 probabilities, RR is the reproductive rate. The starting point is 74 females.

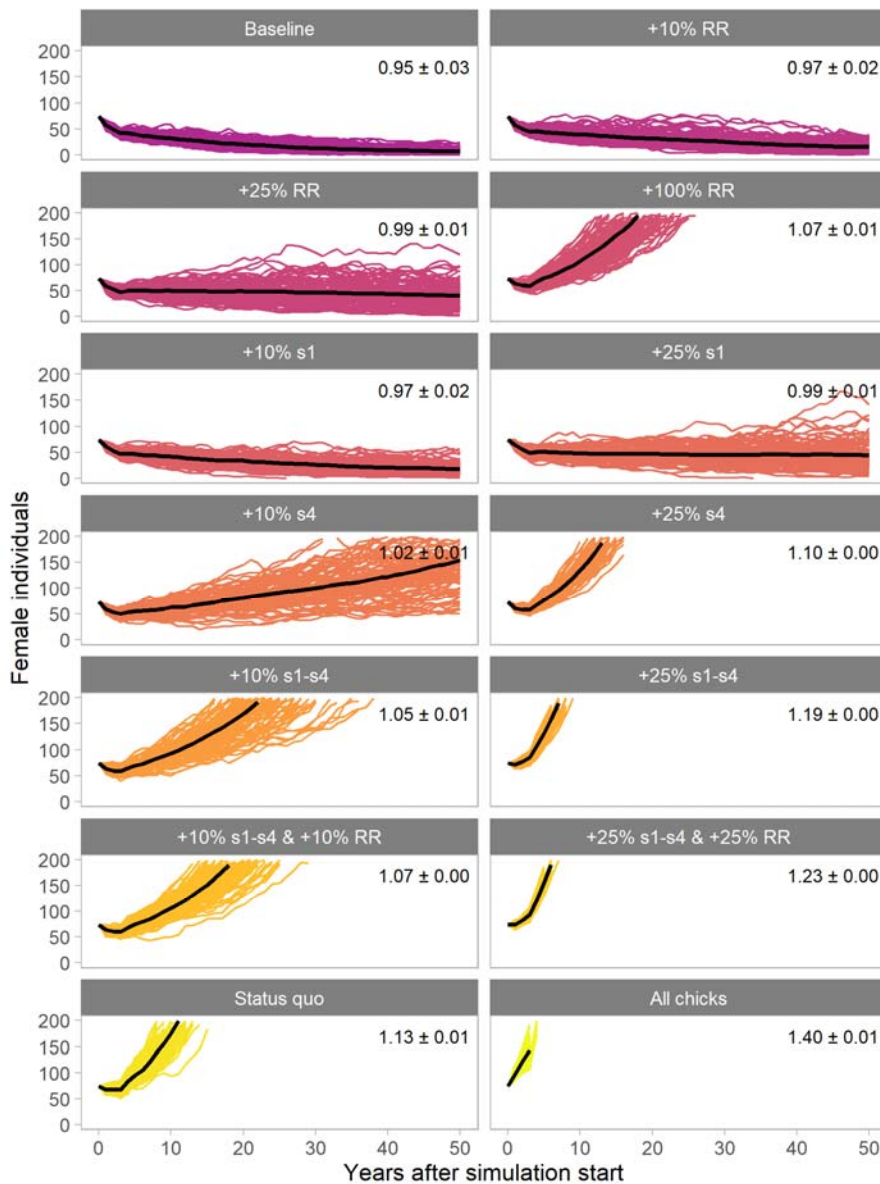

643

644 **Figure 5**

645 Percentage of the respective combination of stochastic event frequency and severity in the  
646 714 sub-scenarios where  $\lambda > 1$  and extinction probability  $P_{EXT\_50} \leq 5\%$ . In all sub-  
647 scenarios, each combination occurred 41 times.

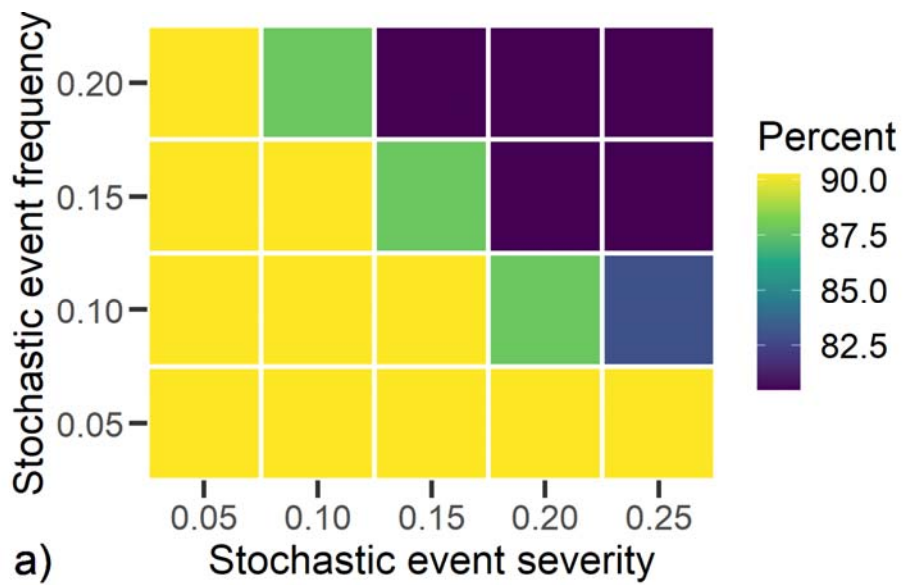

648
